# Supplementary material for: The ASH1 HOMOLOG 2 (ASHH2) Histone H3 Methyltransferase Is Required for Ovule and Anther Development in Arabidopsis
Source: PubMed Central journal article supplement (PMC2772814; doi:10.1371/journal.pone.0007817), 2009-11-12
Supplement: pone.0007817.s006.pdf [file pone.0007817.s006.pdf]

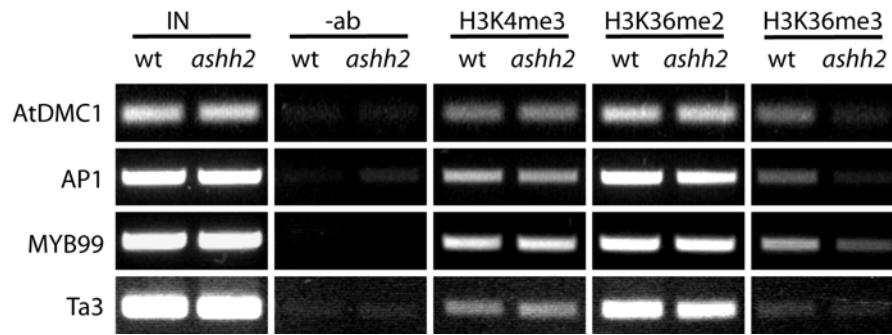

**Figure S6. Changes in histone tail methylation in the *ashh2-1* mutant.** A second biological replicate of ChIP analyses on the down-regulated genes *AP1*, *AtDMC1* and *MYB99* using antibodies against H3K4me3, H3K36me2 and H3K4me3. *Ta3* was used as a control. IN – input; – ab – without antibodies.
