# Supplementary material for: The ASH1 HOMOLOG 2 (ASHH2) Histone H3 Methyltransferase Is Required for Ovule and Anther Development in Arabidopsis
Source: PubMed Central journal article supplement (PMC2772814; doi:10.1371/journal.pone.0007817), 2009-11-12
Supplement: pone.0007817.s007.pdf [file pone.0007817.s007.pdf]

**Table S1. Homeotic transformations in different *ashh2* alleles.**

| Allele         | Number of flowers with transformations | % flowers with transformations | Inflorescences with transformations | % inflorescences with transformation |
|----------------|----------------------------------------|--------------------------------|-------------------------------------|--------------------------------------|
| Col wt         | 0 of 94                                | 0%                             | 0 of 14                             | 0%                                   |
| <i>ashh2-1</i> | 15 of 217                              | 6.90 %                         | 10 of 65                            | 15.38 %                              |
| <i>ashh2-2</i> | 28 of 333                              | 8.40 %                         | 18 of 91                            | 19.78 %                              |
| <i>ashh2-5</i> | 23 of 287                              | 8.01 %                         | 16 of 72                            | 22.22 %                              |
| <i>ashh2-6</i> | 1 of 70                                | 1.43 %                         | 1 of 6                              | 16.67 %                              |
| <i>efs1-1</i>  | 16 of 262                              | 6.10 %                         | 13 of 54                            | 24.07 %                              |
