# Supplementary material for: The ASH1 HOMOLOG 2 (ASHH2) Histone H3 Methyltransferase Is Required for Ovule and Anther Development in Arabidopsis
Source: PubMed Central journal article supplement (PMC2772814; doi:10.1371/journal.pone.0007817), 2009-11-12
Supplement: pone.0007817.s008.pdf [file pone.0007817.s008.pdf]

**Table S2. Up-regulated genes in *ashh2* inflorescences encoding transcription factors and factors involved in development.**

| AtGID     | Name                     | Reference                                             | Log <sub>2</sub> -ratio | Fold up |
|-----------|--------------------------|-------------------------------------------------------|-------------------------|---------|
| At1g01470 | LEA14                    | Kimura et al., Photochem Photobiol 77: 226-233 (2003) | 1.13                    | 2.19    |
| At1g02820 | LEA3 family protein      | -                                                     | 0.76                    | 1.69    |
| At1g04250 | AXR3/IAA17               | Ouellet et al., Plant Cell 13: 829–841 (2001)         | 0.77                    | 1.70    |
| At1g12260 | VND4                     | Kubo et al., Genes Develop 19: 1855–1860 (2005)       | 0.77                    | 1.70    |
| At1g22590 | AGL87/My MADS-box factor | -                                                     | 2.28                    | 4.86    |
| At1g32870 | ANAC 013                 | Ooka et al., DNA Res 10: 239-247 (2003)               | 0.92                    | 1.90    |
| At1g52690 | LEA protein              | Tai et al., Plant Mol Biol 59: 909–925 (2005)         | 0.74                    | 1.67    |
| At1g52890 | ANAC 019                 | Ooka et al., DNA Res 10: 239-247 (2003)               | 0.71                    | 1.64    |
| At1g80840 | WRKY40                   | Xu et al., Plant Cell 18:1310-1326 (2006)             | 0.85                    | 1.80    |
| At2g18550 | AtHB21                   | Henriksson et al., Plant Physiol 139: 509–518 (2005)  | 0.96                    | 1.95    |
| At2g30250 | WRKY25                   | Andreasson et al., EMBO J 24: 2579-89 (2005)          | 0.74                    | 1.67    |
| At2g36080 | DNA-binding protein      | -                                                     | 0.96                    | 1.95    |
| At2g46680 | AtHB7                    | Soderman et al., Plant J 10: 375-81 (1996)            | 0.81                    | 1.75    |
| At2g47190 | MYB2                     | Yoo et al., J Biol Chem 280: 3697-3706 (2005)         | 0.96                    | 1.94    |
| At2g47270 | bHLH                     | Heim et al., Mol Biol Evol 20: 735-747 (2003)         | 0.91                    | 1.88    |
| At3g01600 | ANAC 047                 | Ooka et al., DNA Res 10: 239-247 (2003)               | 1.48                    | 2.78    |
| At3g04070 | ANAC 045                 | Ooka et al., DNA Res 10: 239-247 (2003)               | 0.82                    | 1.76    |
| At3g05800 | bHLH                     | Heim et al., Mol Biol Evol 20: 735-747 (2003)         | 1.27                    | 2.41    |
| At3g20210 | DELTA-VPE                | Nakaune et al., Plant Cell 17: 876-887 (2005)         | 0.73                    | 1.66    |
| At3g23050 | AXR2/IAA7                | Nakamura et al., Plant J 45: 193–205 (2006)           | 1.32                    | 2.50    |
| At3g28857 | DNA-binding protein      | -                                                     | 0.74                    | 1.67    |
| At3g43160 | MEE 38                   | Pagnussat et al., Development 132: 603-614 (2004)     | 0.78                    | 1.72    |
| At3g53440 | DNA-binding protein      | -                                                     | 0.71                    | 1.63    |
| At3g61630 | CRF6                     | Rashotte et al., PNAS 103:11081-11085 (2006)          | 0.82                    | 1.77    |
| At4g36740 | AtHB40                   | Henriksson et al., Plant Physiol 139: 509–518 (2005)  | 0.95                    | 1.94    |
| At5g13330 | RAP2.6                   | Nakano et al., Plant Physiol 140: 411–432 (2006)      | 0.95                    | 1.93    |
| At5g15160 | bHLH                     | Heim et al., Mol Biol Evol 20: 735-747 (2003)         | 0.96                    | 1.94    |
| At5g37260 | MYB73                    | Yanhui et al., Plant Mol Biol 60: 107–124 (2006)      | 0.78                    | 1.72    |
| At5g57520 | ZFP2                     | Tague & Goodman, Plant Mol Biol 28: 267-279 (1995)    | 1.07                    | 2.10    |
| At5g62430 | CDF1                     | Imaizumi et al., Science 309 :293-297 (2005)          | 0.79                    | 1.73    |
