# Supplementary material for: The ASH1 HOMOLOG 2 (ASHH2) Histone H3 Methyltransferase Is Required for Ovule and Anther Development in Arabidopsis
Source: PubMed Central journal article supplement (PMC2772814; doi:10.1371/journal.pone.0007817), 2009-11-12
Supplement: pone.0007817.s009.pdf [file pone.0007817.s009.pdf]

**Table S3. Percentage of pollen showing abnormal exine layer using SEM.**

| Mutant line    | Abnormal phenotype | Wild type phenotype | N   |
|----------------|--------------------|---------------------|-----|
| <i>ashh2-1</i> | 26,3 %             | 73,7 %              | 38  |
| <i>ashh2-2</i> | 79,7 %             | 20,3 %              | 74  |
| <i>ashh2-5</i> | 96,0%              | 4,0%                | 126 |
| <i>ashh2-6</i> | 98,1%              | 1,9%                | 106 |
