# Supplementary material for: The ASH1 HOMOLOG 2 (ASHH2) Histone H3 Methyltransferase Is Required for Ovule and Anther Development in Arabidopsis
Source: PubMed Central journal article supplement (PMC2772814; doi:10.1371/journal.pone.0007817), 2009-11-12
Supplement: pone.0007817.s010.pdf [file pone.0007817.s010.pdf]

**Table S4. Genes down-regulated in *ash2* inflorescences (>1.6-fold) and *ms1* young buds (> 2-fold).**

| AtGID            | Name/Protein                          | AtGID            | Name/Protein                          |
|------------------|---------------------------------------|------------------|---------------------------------------|
| At1g02790        | PGA4 exopolygalacturonase             | <b>At2g47040</b> | VDG1                                  |
| <b>At1g02813</b> | expressed protein                     | <b>At2g47050</b> | pectin methylesterase inhibitor       |
| <b>At1g06260</b> | cysteine proteinase                   | <b>At3g01270</b> | pectate lyase                         |
| <b>At1g07340</b> | ATSTP2                                | At3g03910        | glutamate dehydrogenase               |
| <b>At1g13140</b> | CYP86C3 protein                       | At3g07850        | exopolygalacturonase                  |
| At1g13150        | CYP86C4 protein                       | <b>At3g13400</b> | SKS13                                 |
| <b>At1g15460</b> | anion exchange family protein         | <b>At3g15900</b> | expressed protein                     |
| <b>At1g18280</b> | LTP                                   | <i>At3g25050</i> | XTH3                                  |
| <b>At1g20120</b> | GDSL-like Lipase                      | <b>At3g26125</b> | CYP86C2 protein                       |
| At1g23240        | caleosin-related protein, pollen coat | <b>At3g28790</b> | expressed protein                     |
| <i>At1g23250</i> | caleosin-related protein, pollen coat | At3g28830        | expressed protein                     |
| At1g23560        | expressed protein                     | <b>At3g28980</b> | expressed protein                     |
| At1g23570        | expressed protein                     | At3g51000        | epoxide hydrolase                     |
| At1g23600        | expressed protein                     | <b>At3g51590</b> | LTP12                                 |
| At1g23670        | expressed protein                     | <b>At3g52160</b> | beta-ketoacyl-CoA synthase            |
| At1g23690        | expressed protein                     | At3g52810        | ATPAP21                               |
| <b>At1g24400</b> | AATL2                                 | At3g57620        | glyoxal oxidase-related protein       |
| At1g26710        | expressed protein                     | <b>At3g57690</b> | AGP23                                 |
| At1g28375        | expressed protein                     | At3g57810        | expressed protein                     |
| At1g28430        | CYP705A24 protein                     | <b>At4g04460</b> | aspartyl protease                     |
| At1g30020        | expressed protein                     | <b>At4g08670</b> | LTP                                   |
| At1g30350        | pectate lyase protein                 | At4g10260        | pfkB-type carbohydrate kinase         |
| <b>At1g47980</b> | expressed protein                     | <b>At4g13560</b> | LEA protein                           |
| At1g50310        | STP9                                  | <b>At4g14815</b> | LTP                                   |
| At1g54860        | expressed protein                     | At4g16160        | Tim17/Tim22/Tim23 protein             |
| At1g54870        | SDR protein                           | At4g23660        | ATPPT1                                |
| <b>At1g59740</b> | POT protein                           | <b>At4g29250</b> | Transferase protein                   |
| <b>At1g61110</b> | AtNAC025                              | At4g35770        | SEN1                                  |
| <b>At1g61566</b> | RALFL9                                | <b>At4g37900</b> | glycine-rich protein                  |
| At1g63060        | expressed protein                     | At5g07410        | GRP14, pollen coat                    |
| <b>At1g63180</b> | UDP-glucose 4-epimerase               | At5g07520        | GRP18, pollen coat                    |
| <b>At1g67990</b> | caffeoyl-CoA 3-O-methyltransferase    | <i>At5g07530</i> | GRP17, pollen coat                    |
| <b>At1g68875</b> | expressed protein                     | At5g07540        | GRP16, pollen coat                    |
| <b>At1g71160</b> | beta-ketoacyl-CoA synthase            | <b>At5g07550</b> | GRP19, pollen coat                    |
| <b>At1g72280</b> | AERO 1                                | <b>At5g07560</b> | GRP20, pollen coat                    |
| <b>At1g74540</b> | CYP98A8 protein                       | At5g09550        | Rab GDP dissociation inhibitor        |
| <b>At1g74550</b> | CYP98A8 protein                       | <b>At5g13380</b> | auxin-responsive GH3 protein          |
| <b>At1g75910</b> | EXL4, pollen coat                     | <b>At5g14980</b> | esterase/lipase/thioesterase          |
| <b>At1g75920</b> | EXL5, pollen coat                     | <b>At5g20710</b> | BGAL7                                 |
| <b>At1g75930</b> | EXL6, pollen coat                     | At5g28470        | POT protein                           |
| <b>At1g75940</b> | ATA27                                 | At5g37810        | major intrinsic family protein        |
| <b>At1g76470</b> | cinnamoyl-CoA reductase               | <b>At5g38760</b> | expressed protein                     |
| <b>At1g80660</b> | AHA9                                  | <i>At5g44400</i> | FAD-binding domain-containing protein |
| <b>At2g03740</b> | LEA protein                           | <b>At5g45880</b> | pollen Ole e 1 allergen               |
| <b>At2g03850</b> | LEA protein                           | At5g46795        | expressed protein                     |
| At2g07560        | AHA6                                  | <b>At5g47635</b> | expressed protein                     |
| At2g16750        | protein kinase                        | <b>At5g48210</b> | expressed protein                     |
| At2g18420        | gibberellin-responsive protein        | <b>At5g49070</b> | beta-ketoacyl-CoA synthase            |
| At2g19070        | transferase protein                   | At5g52360        | actin-depolymerizing factor           |
| At2g21490        | dehydrin                              | At5g53820        | expressed protein                     |
| At2g23800        | GGPS2                                 | <b>At5g59845</b> | gibberellin-regulated protein         |
| At2g31980        | cysteine proteinase inhibitor         | <i>At5g60500</i> | UPP synthetase                        |
| At2g32890        | expressed protein                     | At5g61605        | expressed protein                     |
| <b>At2g41040</b> | methyltransferase-related protein     | <b>At5g62320</b> | MYB99                                 |
| <b>At2g41290</b> | strictosidine synthase                | <b>At5g65205</b> | SDR protein                           |
| At2g46860        | inorganic pyrophosphatase             |                  |                                       |

Genes in italics induced by MS1 (Ito et al., 2007). Genes in bold also down-regulated by *spl/ems1* (Wijeratne et al., 2007).
