# Supplementary material for: The ASH1 HOMOLOG 2 (ASHH2) Histone H3 Methyltransferase Is Required for Ovule and Anther Development in Arabidopsis
Source: PubMed Central journal article supplement (PMC2772814; doi:10.1371/journal.pone.0007817), 2009-11-12
Supplement: pone.0007817.s012.pdf [file pone.0007817.s012.pdf]

**Table S6. List of primers.**

| Primer name         | Application | Oligo sequence                                                   | Gene name | AGI code            |
|---------------------|-------------|------------------------------------------------------------------|-----------|---------------------|
| ASHH2_65460_R2      | Genotyping  | 5'-TTGGGTACACATGGATCAAATAAG-3'                                   | ASHH2     | At1g77300           |
| ASHH2_65480_F2      | Genotyping  | 5'-TTGCCTATTTGTTATGTACAGTAATGC-3'                                | ASHH2     | At1g77300           |
| SALK026442_SW_LP    | Genotyping  | 5'-GCTGGGGTTTATGTAGGAAG-3'                                       | ASHH2     | At1g77300           |
| SALK026442_SW_RP    | Genotyping  | 5'-CACTGTCCAGTAAAAGCTGGC-3'                                      | ASHH2     | At1g77300           |
| SALK040477_SW_LP    | Genotyping  | 5'-CGTTTTCTTACAGTCCATCG-3'                                       | ASHH2     | At1g77300           |
| SALK040477_SW_RP    | Genotyping  | 5'-GGGGCTGTGTGAGTCTTATTG-3'                                      | ASHH2     | At1g77300           |
| ASHH2_SALK_36941_LP | Genotyping  | 5'-AAGATGATTACCTCATTCCCA-3'                                      | ASHH2     | At1g77300           |
| ASHH2_SALK_36941_RP | Genotyping  | 5'-GAAAAGGAACAGAAGACGAAG-3'                                      | ASHH2     | At1g77300           |
| IPCR15              | Genotyping  | 5'-ACCGTTGCGGTTCTGTCAATT-3'                                      | -         | T-DNA Right Border  |
| J504                | Genotyping  | 5'-GCGTGGACCGCTTGTGCAACTCTCTCAGG-3'                              | -         | T-DNA Left Border   |
| LBa1                | Genotyping  | 5'-TGTTTCACGTAGTGGGCCATCG-3'                                     | -         | T-DNA Left Border   |
| Ashh2_probe_14_LP   | RT          | 5'-CAACAGCAGCCCATCAAAT-3'                                        | ASHH2     | At1g77300           |
| Ashh2_probe_14_RP   | RT          | 5'-CTCGTTTCTTCCCTTCAA-3'                                         | ASHH2     | At1g77300           |
| PI_probe_7_LP       | RT          | 5'-AAAGAGAATGATAGCTTACAACGGAG-3'                                 | PI        | AT5G20240           |
| PI_probe_7_RP       | RT          | 5'-TCGACAGCCATCAGATTTTTC-3'                                      | PI        | AT5G20240           |
| AP1_probe_89_LP     | RT, ChIP    | 5'-ATATGCCTCCCCCTCTGC-3'                                         | AP1       | AT1G69120           |
| AP1_probe_89_RP     | RT, ChIP    | 5'-GGATCATCTTCTTATACAGACCA-3'                                    | AP1       | AT1G69120           |
| AP3_probe_119_LP    | RT          | 5'-CGAGCGCAAGTTCAAATCT-3'                                        | AP3       | AT3G54340           |
| AP3_probe_119_RP    | RT          | 5'-TTCAGCTCTTAGTCCAGCTCA-3'                                      | AP3       | AT3G54340           |
| AtDMC1_PL_LP        | RT, ChIP    | 5'-CAGGGTGTCAAGCTCTCGAT-3'                                       | AtDMC1    | AT3G22880           |
| AtDMC1_PL_RP        | RT, ChIP    | 5'-CTGTGATGGCTGAGGTTTCA-3'                                       | AtDMC1    | AT3G22880           |
| MYB99 Int F         | ChIP        | 5'-CAAACTGGCGGGCTAAGGAG-3'                                       | MYB99     | AT5G62320           |
| MYB99 Int R         | ChIP        | 5'-CTCCACTGCAATCTTCGACCATCTA-3'                                  | MYB99     | AT5G62320           |
| Ta3F                | ChIP        | 5'-GAGAGCAAACAGAGTGAGGCTCG-3'                                    | Ta3       | Ta3 retrotransposon |
| Ta3R                | ChIP        | 5'-TTGCTTCAGTTTTGGTAAGCGGA-3'                                    | Ta3       | Ta3 retrotransposon |
| SP/QRT3 269-1860)   | RT          | 5'-CACAGGCTCAAGTATAACCC-3'                                       | QRT 3     | AT4G20050           |
| ASP/QRT3 269-1860   | RT          | 5'-TTAGCTCCATGGTTTCTCC-3'                                        | QRT 3     | AT4G20050           |
| SP/UNE15 31-440     | RT          | 5'-CACAACTTCAAATCCTCATCATC-3'                                    | UNE15     | AT4G13560           |
| ASP/UNE15 31-440    | RT          | 5'-TTTCTCTTGAGCTTGGCCTC-3'                                       | UNE15     | AT4G13560           |
| SP/MEE48 591-1588   | RT          | 5'-ATTCTCTCCGGTCTCGTTTC-3'                                       | MEE48     | AT4G14080           |
| ASP/MEE48 591-1588  | RT          | 5'-CGGAAGTAAGGATGAACATTAAGG-3'                                   | MEE48     | AT4G14080           |
| MYB99 UPL 1 F       | RT          | 5'-GCTCGCCTTGGCAATAGA-3'                                         | MYB99     | AT5G62320           |
| MYB99 UPL1 R        | RT          | 5'-GCTTCTCTTATATGAGTGTCCA-3'                                     | MYB99     | AT5G62320           |
| At5g61430 UPL1 F    | RT          | 5'-TGAGTACAGGCTTGAAGGAAAA-3'                                     | NAC5      | At5g61430           |
| At5g61430 UPL1 R    | RT          | 5'-CCTGCATATCACCCATTTCATT-3'                                     | NAC5      | At5g61430           |
| At1g61110 UPL1 F    | RT          | 5'-CAAAGACCAACAATGGAGAGAGT-3'                                    | NAC25     | At1g61110           |
| At1g61110 UPL1 R    | RT          | 5'-AGAATTAGCAGATGATTTGAGAGC-3'                                   | NAC25     | At1g61110           |
| ACT2_102 left       | RT          | 5'-CGCTTTTCTTTCCAAGCTC-3'                                        | ACTIN2    | AT3G18780           |
| ACT2_102 right      | RT          | 5'-CCGGTACCATTGTACACAC-3'                                        | ACTIN2    | AT3G18780           |
| 2135L               | In situ     | 5'-ATAAAGAGGGTCTGCATCATGG-3'                                     | ASHH2     | At1g77300           |
| 3115R               | In situ     | 5'-CATAACCCTTCTACCGGATTG-3'                                      | ASHH2     | At1g77300           |
| promGUS_ASHH2_attB1 | Cloning     | 5'-GGGACAAGTTTGTACAAAAAAGCAGGC<br>TTCTCATCTTCAATATGGACGGTGTCC-3' | ASHH2     | At1g77300           |
| promGUS_ASHH2_attB2 | Cloning     | 5'-GGGACCACTTTGTACAAAGAAAGCTGGGT<br>CCGCCGCAACAGAGACTAAATAA-3'   | ASHH2     | At1g77300           |
